# Supplementary material for: Structure of LdtMt2, an l,d-transpeptidase from Mycobacterium tuberculosis
Source: PubMed Central journal article supplement (PMC3605044; doi:10.1107/s0907444912049268), 2013-02-16

Figure S1: (A) Mass spectrometric analysis of the Ldt<sub>M12</sub> segment (residues 34-408) with and without imipinem (300.6 Da). The mass difference in the major peaks corresponds very closely to the mass of imipinem (299.3 Da). (B) Molecular mass of the BC-module (residues 149-408), 28481.7 Da. The increase in mass upon binding  $\beta$ -lactam antibiotics, imipinem (299.3 Da) and ampicillin (349.4 Da) could be validated with 28780.1 Da and 28831.7 Da for each covalently formed adduct respectively.

A

| Peak ID | Compound | Time | Mass Found |
|---------|----------|------|------------|
| 1       |          | 3.10 |            |

1: (Time: 3.10)

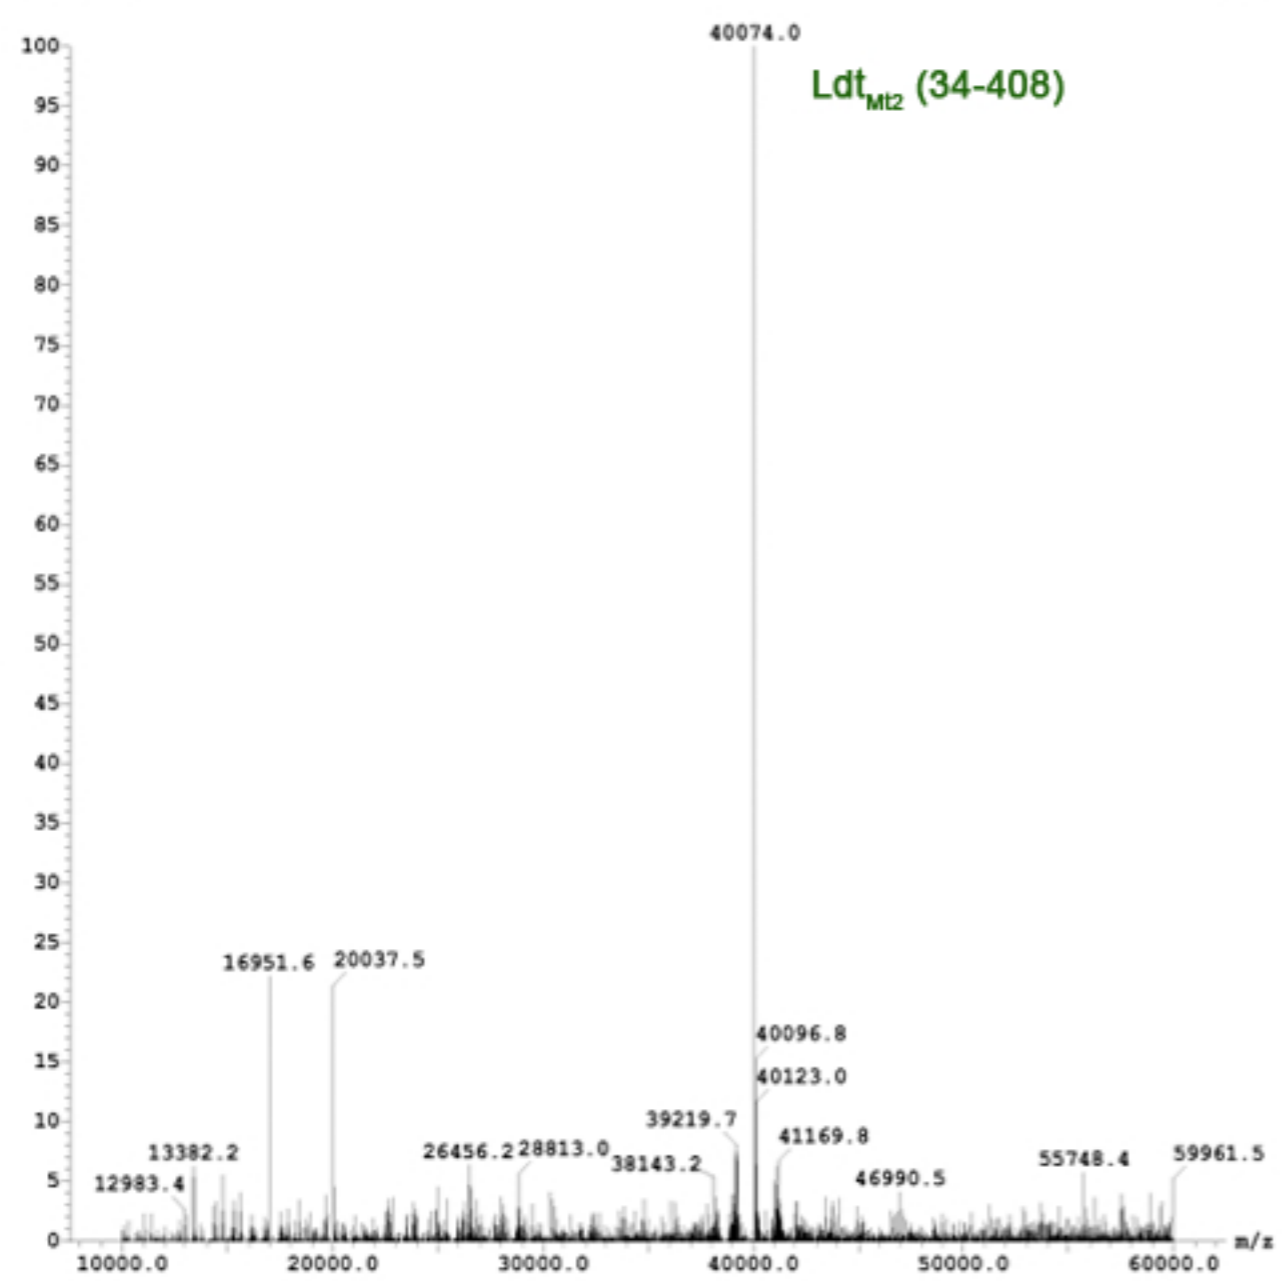

| Peak ID | Compound | Time | Mass Found |
|---------|----------|------|------------|
| 1       |          | 3.10 |            |

8.7e+003 1: (Time: 3.10)

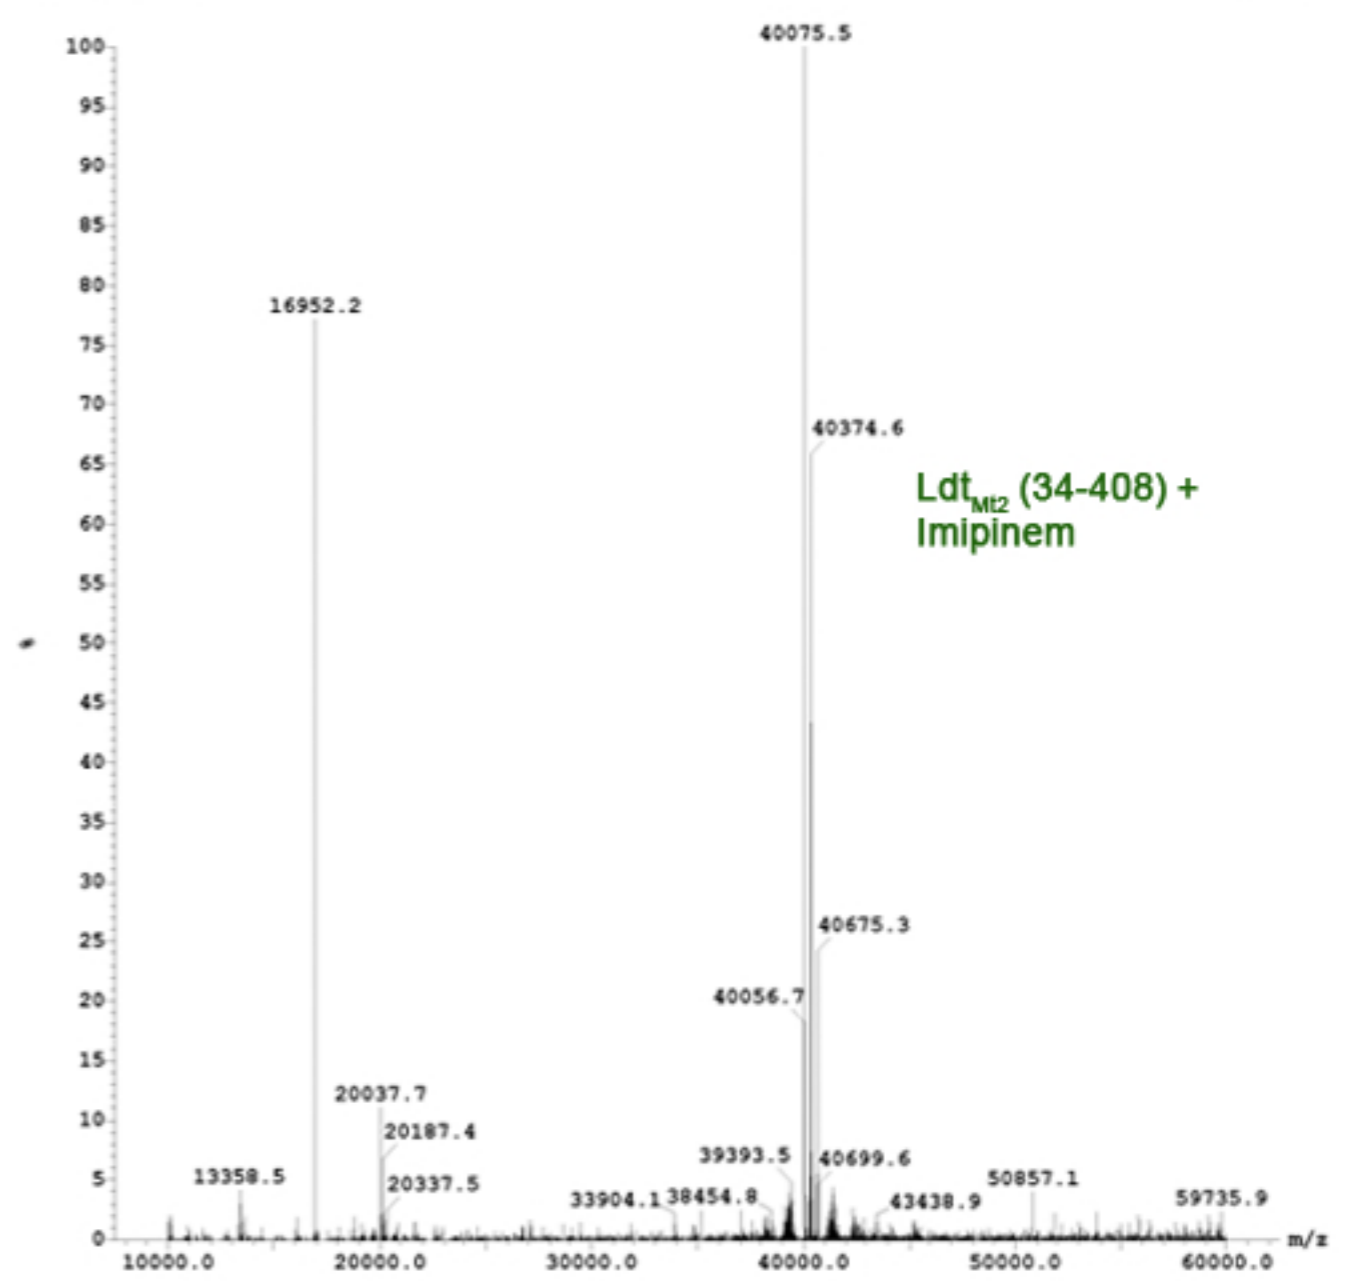

1.4e+004

B

Peak ID 1  
Compound  
Time 3.18  
Mass Found

1: (Time: 3.18)

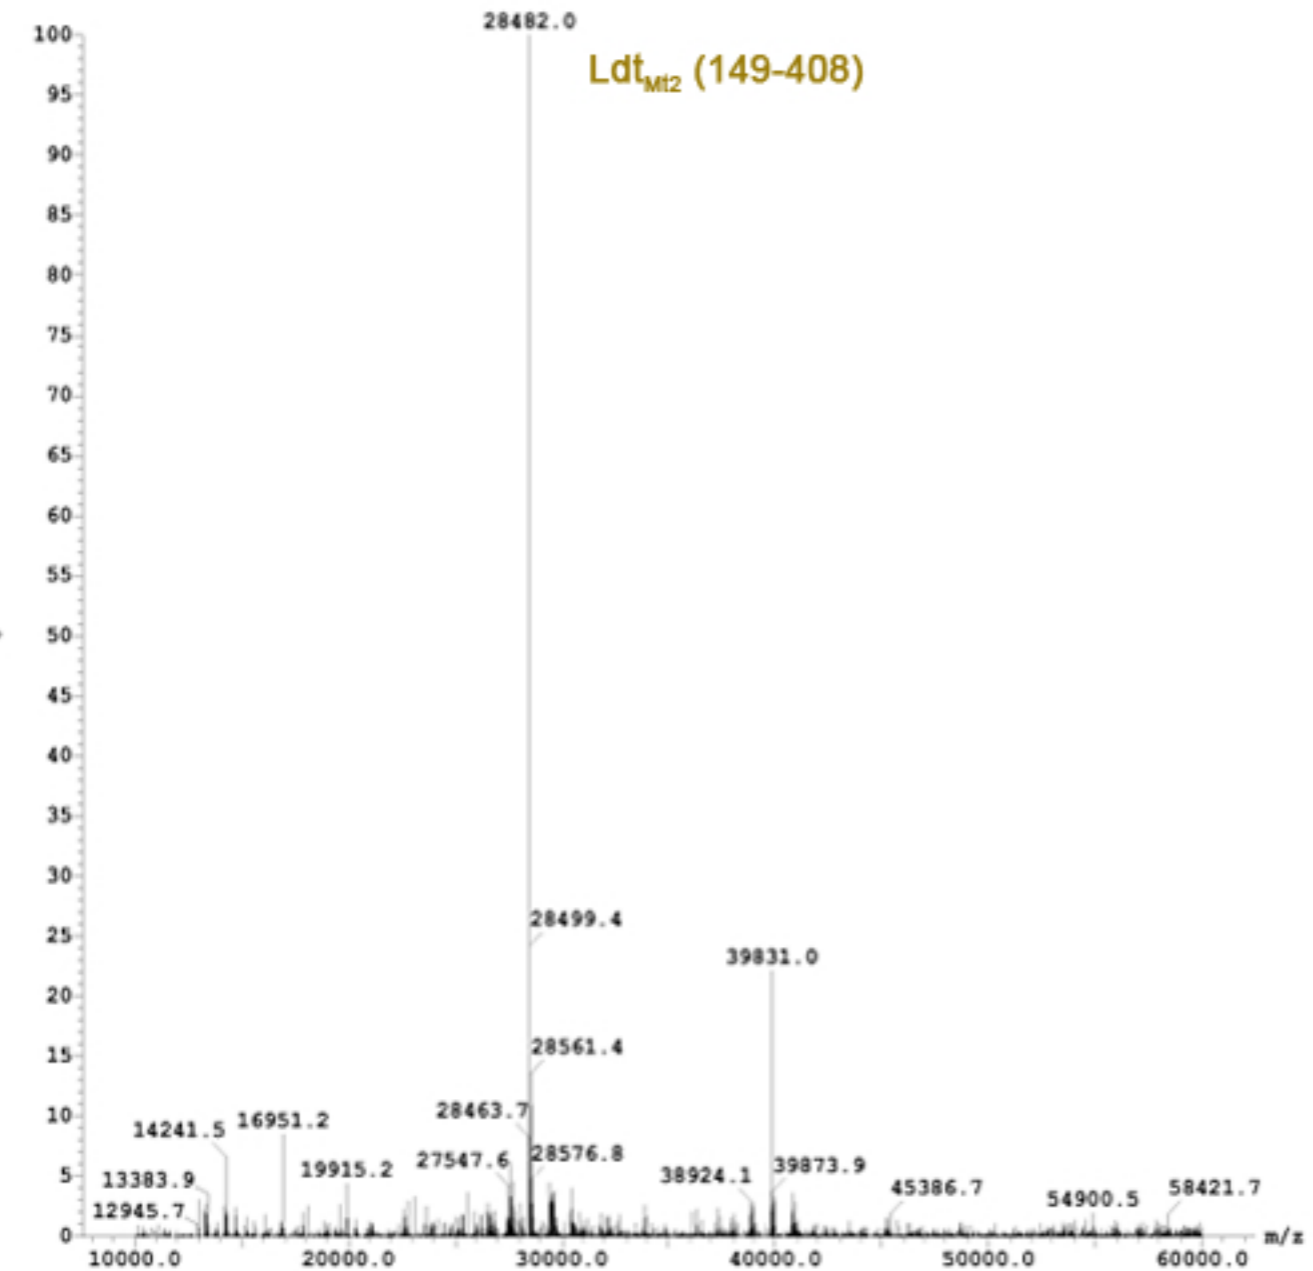

Peak ID 1  
Compound  
Time 3.10  
Mass Found

2.4e+004

1: (Time: 3.10)

5.4e+004

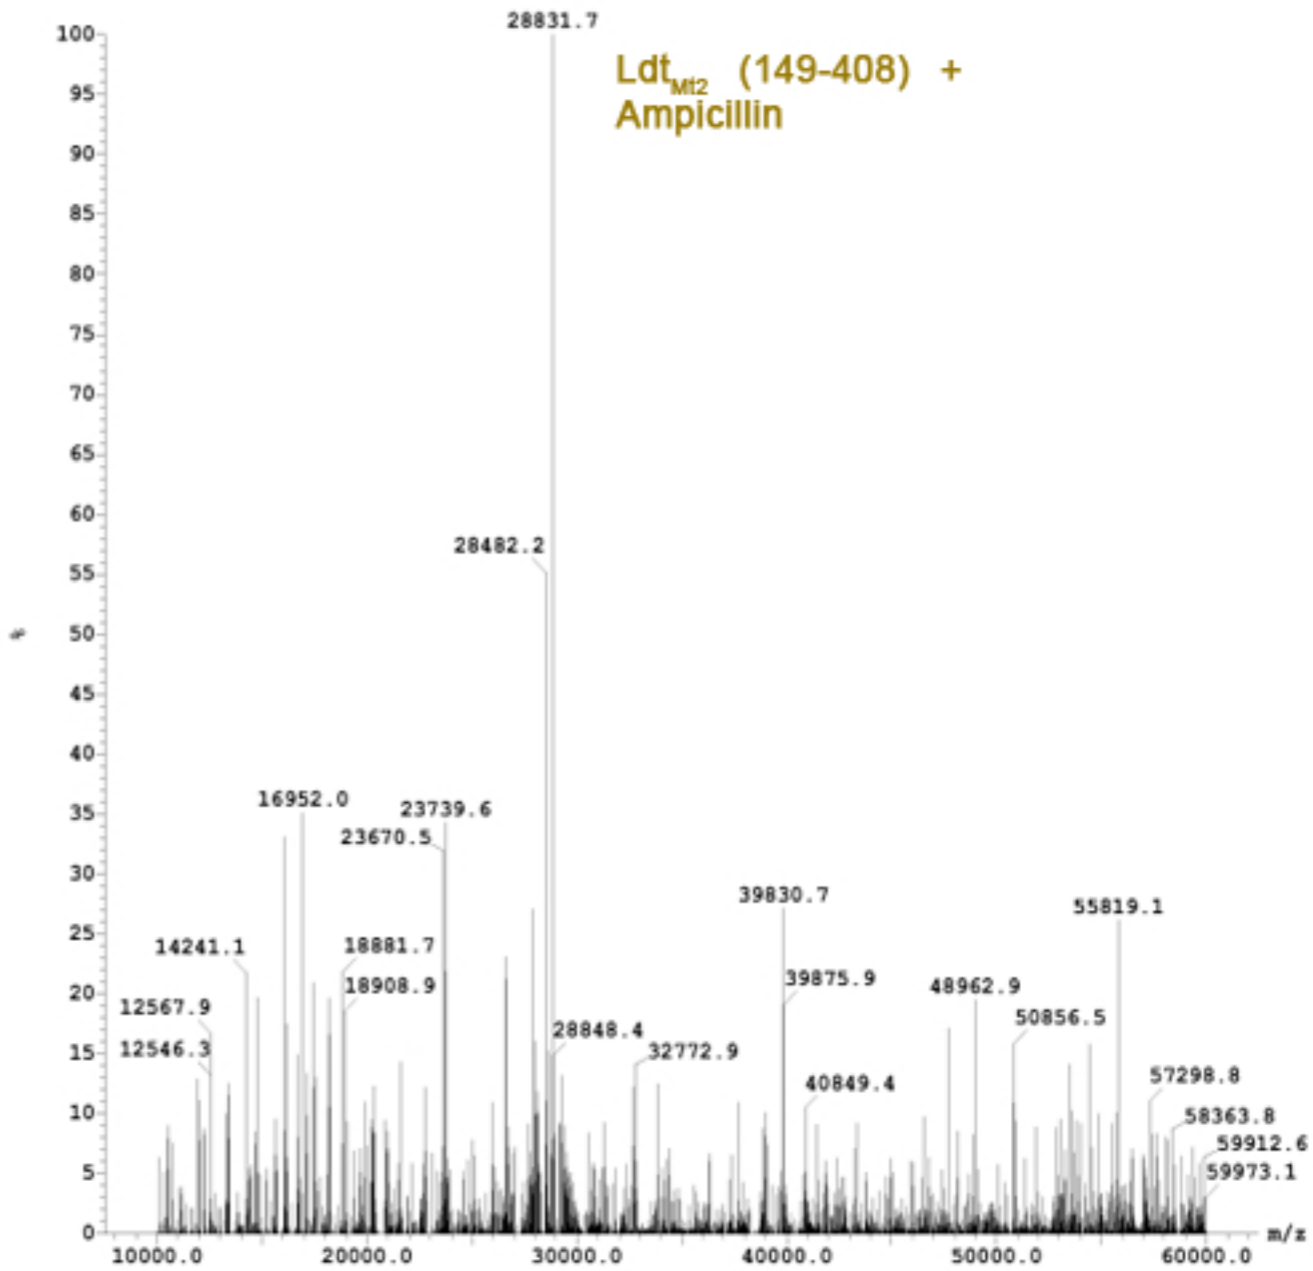

Peak ID Compound Time Mass Found

1: (Time: 3.10)

5.1e+003

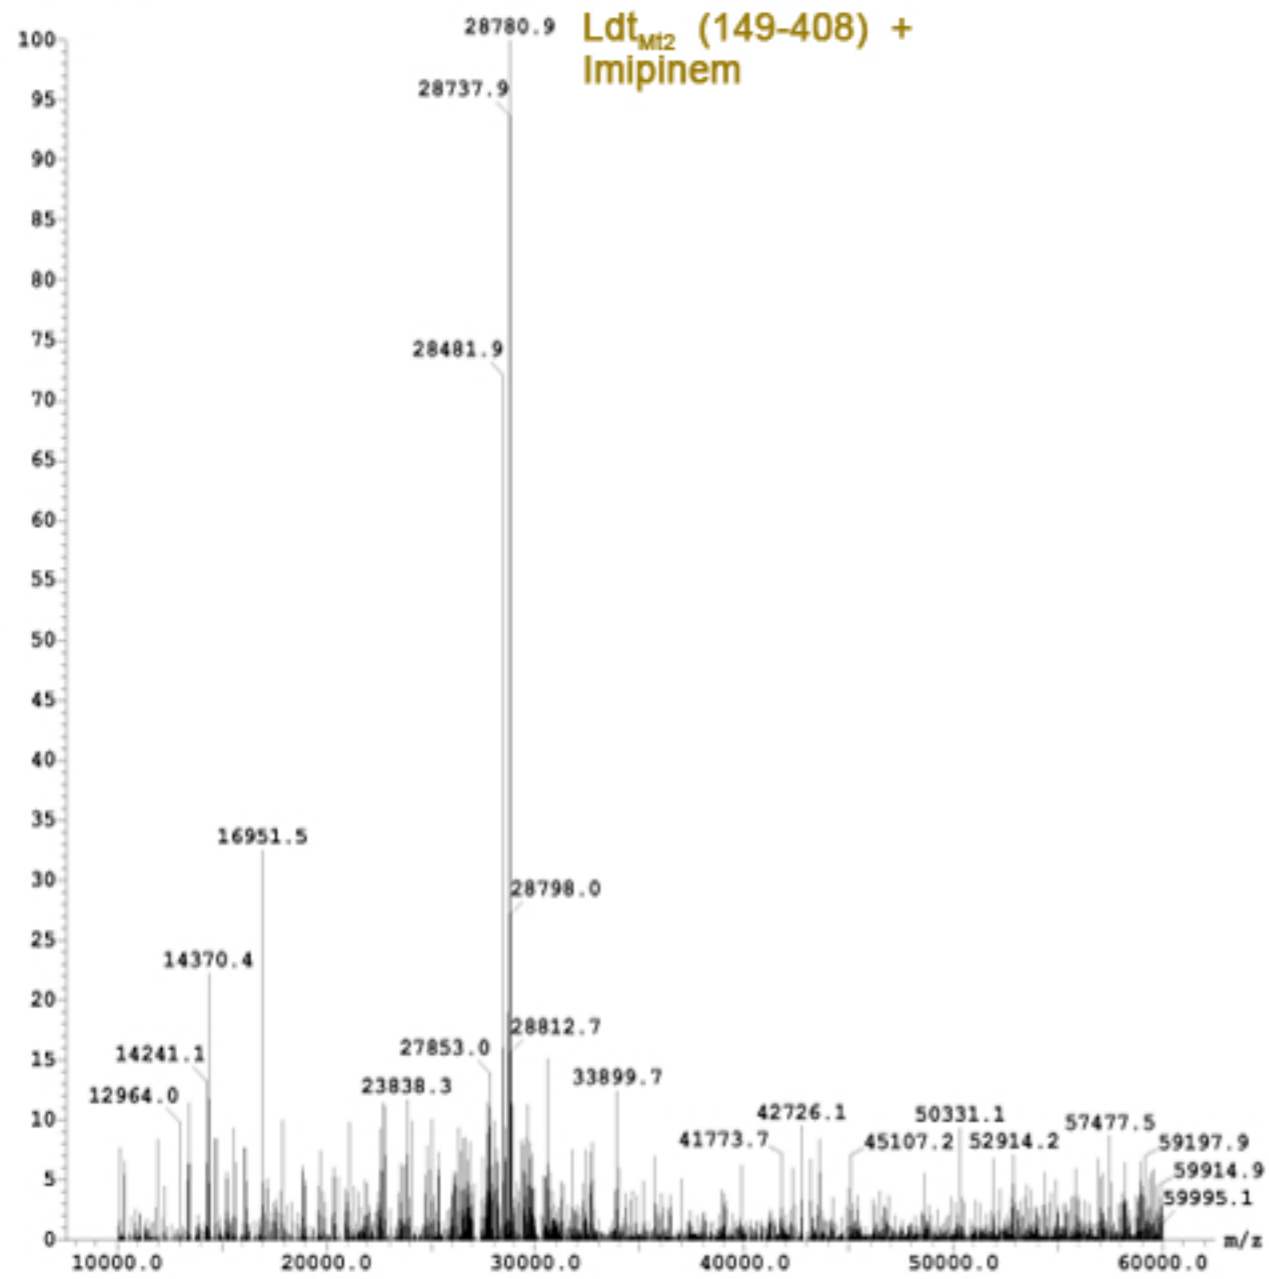

Supplement: d-69-00432-sup1.pdf [file d-69-00432-sup1.pdf]
